# Supplementary material for: Biogeography of bacterial communities exposed to progressive long-term environmental change
Source: PubMed Central journal article supplement — ISME J. 2012 Dec 20;7(5):937–48. doi: 10.1038/ismej.2012.168 (PMC3635229; doi:10.1038/ismej.2012.168), 2012-12-20

0 2 4 6 Kilometres

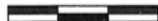

## Vestfold Hills

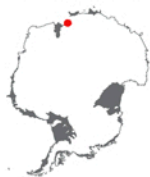

68°30'S

68°35'S

16

Davis

Broad Peninsula

Mule Peninsula

Sørsdal Glacier

78°00'E

78°30'E

Continental Ice Plateau

N

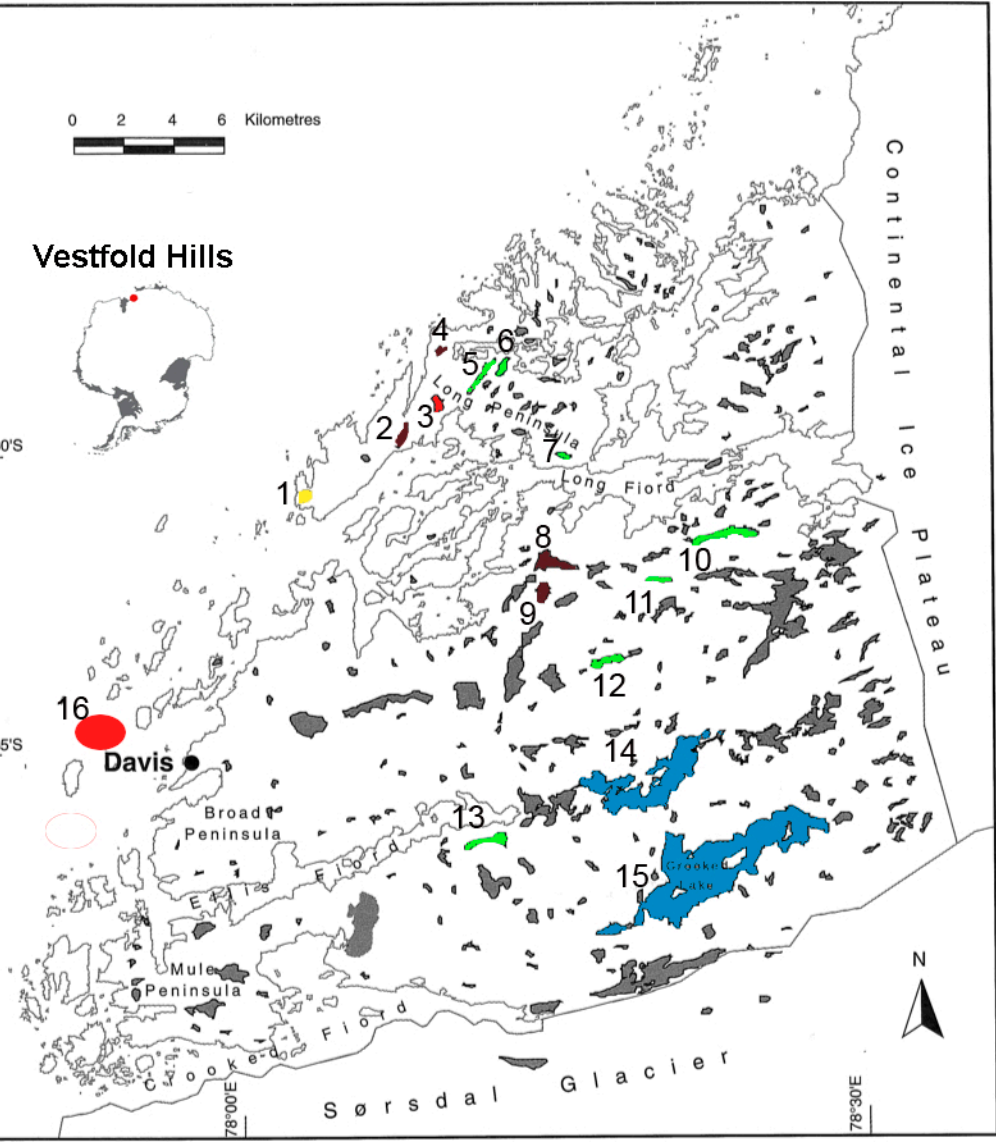

Supplement: ismej2012168x2.pdf [file ismej2012168x2.pdf]
