# Supplementary material for: Biogeography of bacterial communities exposed to progressive long-term environmental change
Source: PubMed Central journal article supplement — ISME J. 2012 Dec 20;7(5):937–48. doi: 10.1038/ismej.2012.168 (PMC3635229; doi:10.1038/ismej.2012.168), 2012-12-20
Supplement: ismej2012168x4.pdf [file ismej2012168x4.pdf]

Taxa

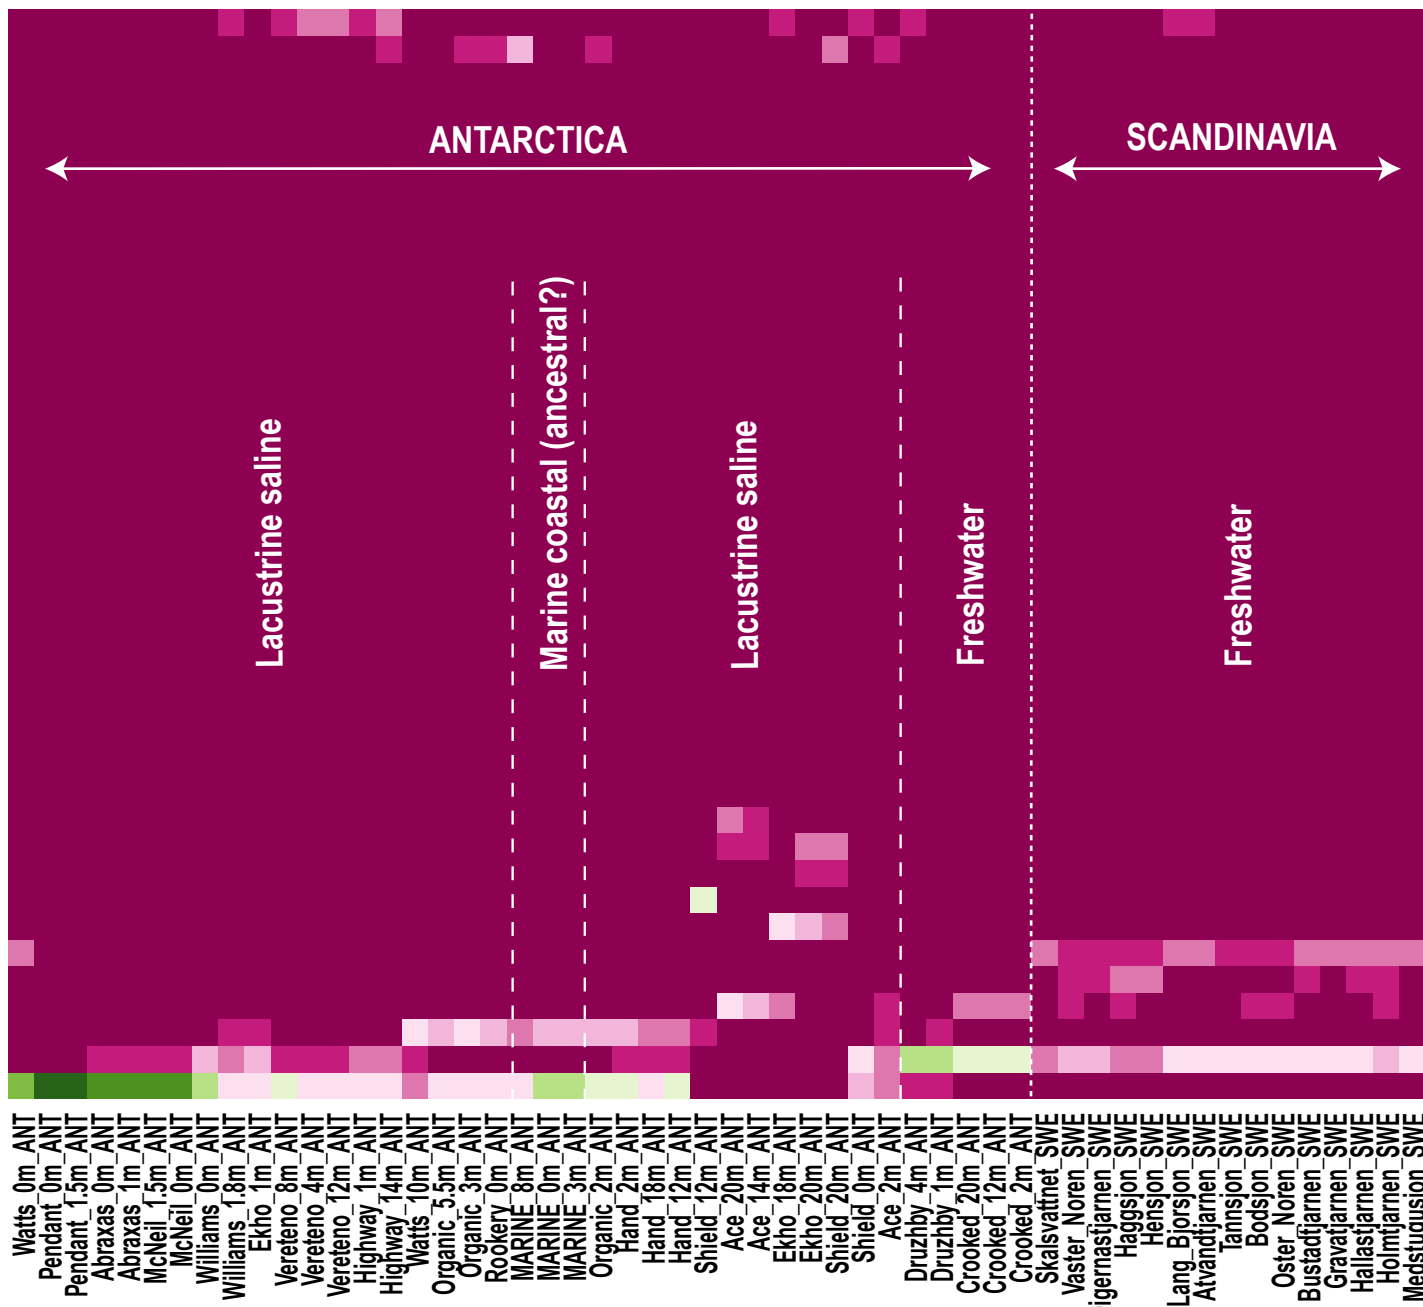

ANTARCTICA

SCANDINAVIA

Lacustrine saline

Marine coastal (ancestral?)

Lacustrine saline

Freshwater

Freshwater

Watts\_0m\_ANT  
Pendant\_1.5m\_ANT  
Abraxas\_0m\_ANT  
McNeil\_1.5m\_ANT  
McNeil\_0m\_ANT  
Williams\_1.8m\_ANT  
Ekho\_1m\_ANT  
Vereteno\_8m\_ANT  
Vereteno\_4m\_ANT  
Vereteno\_12m\_ANT  
Highway\_1m\_ANT  
Highway\_14m\_ANT  
Watts\_10m\_ANT  
Organic\_5.5m\_ANT  
Organic\_3m\_ANT  
Rookery\_0m\_ANT  
MARINE\_8m\_ANT  
MARINE\_0m\_ANT  
MARINE\_3m\_ANT  
Organic\_2m\_ANT  
Hand\_2m\_ANT  
Hand\_18m\_ANT  
Hand\_12m\_ANT  
Shield\_12m\_ANT  
Ace\_20m\_ANT  
Ace\_14m\_ANT  
Ekho\_18m\_ANT  
Ekho\_20m\_ANT  
Shield\_0m\_ANT  
Ace\_2m\_ANT  
Druzby\_4m\_ANT  
Druzby\_1m\_ANT  
Crooked\_20m\_ANT  
Crooked\_12m\_ANT  
Crooked\_2m\_ANT  
Skalsvatnet\_SWE  
Vaster\_Noren\_SWE  
Digernastjarnen\_SWE  
Haggstjon\_SWE  
Hensjon\_SWE  
Lang\_Bjorsjon\_SWE  
Atvandstjarnen\_SWE  
Tannsjon\_SWE  
Bodstjon\_SWE  
Oster\_Noren\_SWE  
Bustadstjarnen\_SWE  
Gravatstjarnen\_SWE  
Hallastjarnen\_SWE  
Holmtjarnen\_SWE  
Medstugusjon\_SWE

Bacteroidetes;Sphingobacteria  
Proteobacteria;Alphaproteobacteria  
Planctomycetes;Planctomycetacia  
Cyanobacteria;Cyanobacteria  
Firmicutes;"Bacilli"  
Gemmatimonadetes  
Chloroflexi;Chloroflexi  
OP10;OP10\_genera\_incertainae\_sedis  
Bacteroidetes;Bacteroidetes  
SR1;SR1\_genera\_incertainae\_sedis  
Deferribacteres;Deferribacteres  
Fibrobacteres;Fibrobacteres  
BRC1;BRC1\_genera\_incertainae\_sedis  
Fusobacteria;Fusobacteria  
WS3;WS3\_genera\_incertainae\_sedis  
Nitrospira;Nitrospira  
Firmicutes;"Erysipelotrichi"  
Deinococcus-Thermus;Deinococci  
OP11;OP11\_genera\_incertainae\_sedis  
Other  
Tenericutes;Mollicutes  
Chloroflexi;Anaerolineae  
Lentisphaerae;Lentisphaerae  
TM7;TM7\_genera\_incertainae\_sedis  
Acidobacteria  
Chlamydiae;Chlamydiae  
Spirochaetes;Spirochaetes  
Firmicutes;Other  
OD1;OD1\_genera\_incertainae\_sedis  
Verrucomicrobia;Verrucomicrobiae  
Chlorobi;Chlorobia  
Proteobacteria;Deltaproteobacteria  
Firmicutes;"Clostridia"  
Proteobacteria;Epsilonproteobacteria  
Bacteroidetes;Other  
Proteobacteria;Betaproteobacteria  
Proteobacteria  
Bacteria  
Proteobacteria;Gammaproteobacteria  
Actinobacteria  
Bacteroidetes;Flavobacteria

Relative Abundance

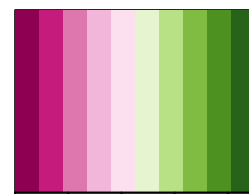

0 0.4 0.8

Samples
