# Supplementary figures and images for: Biogeography of bacterial communities exposed to progressive long-term environmental change
Source: PubMed Central journal article supplement — ISME J. 2012 Dec 20;7(5):937–48. doi: 10.1038/ismej.2012.168 (PMC3635229; doi:10.1038/ismej.2012.168), 2012-12-20

# Niche breadth

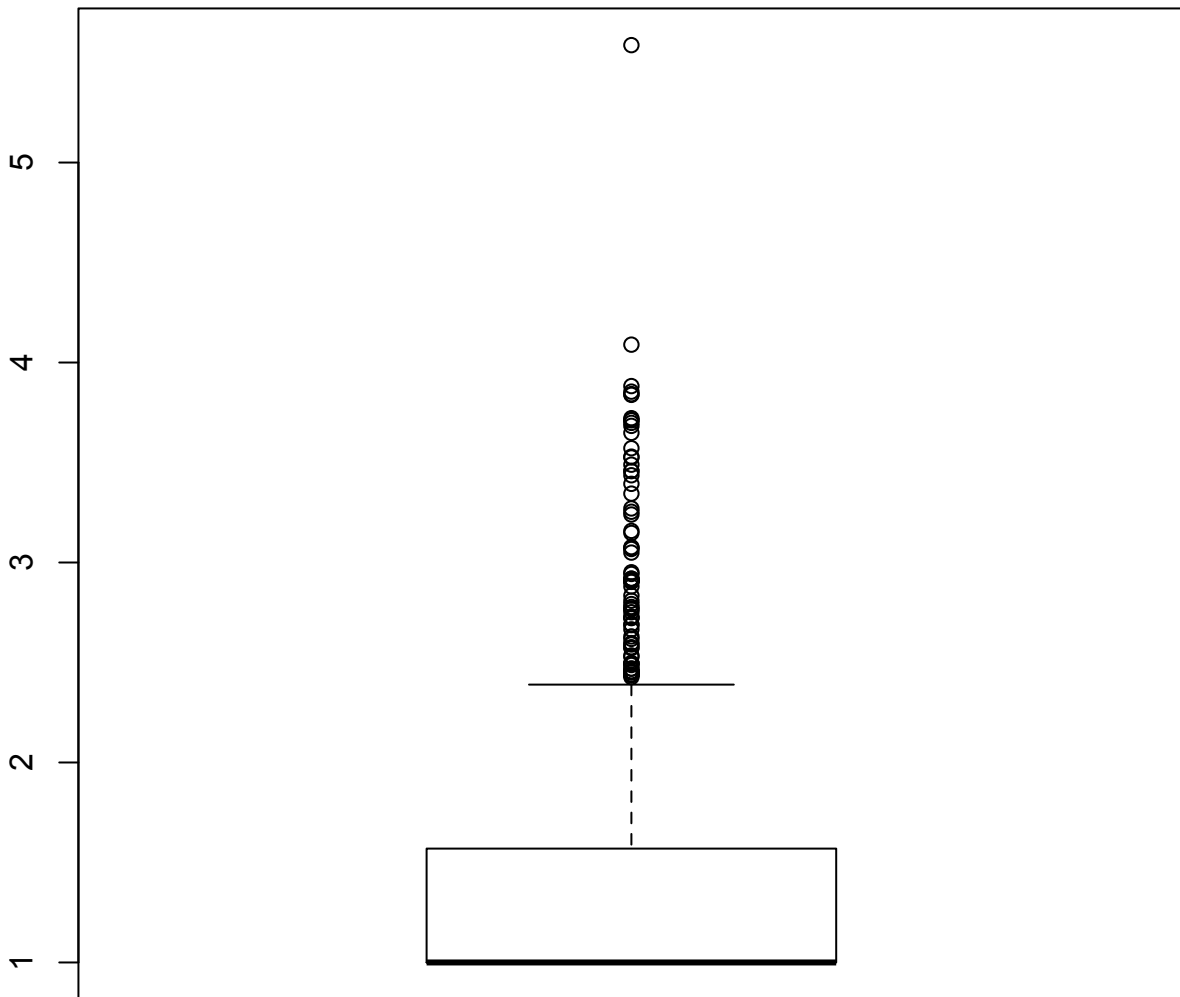

Supplement: ismej2012168x3.pdf [file ismej2012168x3.pdf]
